# Supplementary material for: The growth simulation of pine-needle like structure with diffusion-limited aggregation and oriented attachment
Source: Royal Society of Chemistry journal article supplement (doi:10.1039/d2ra03649e), 2022-01-01
Supplement: d2ra03649e1.pdf [file d2ra03649e1.pdf]

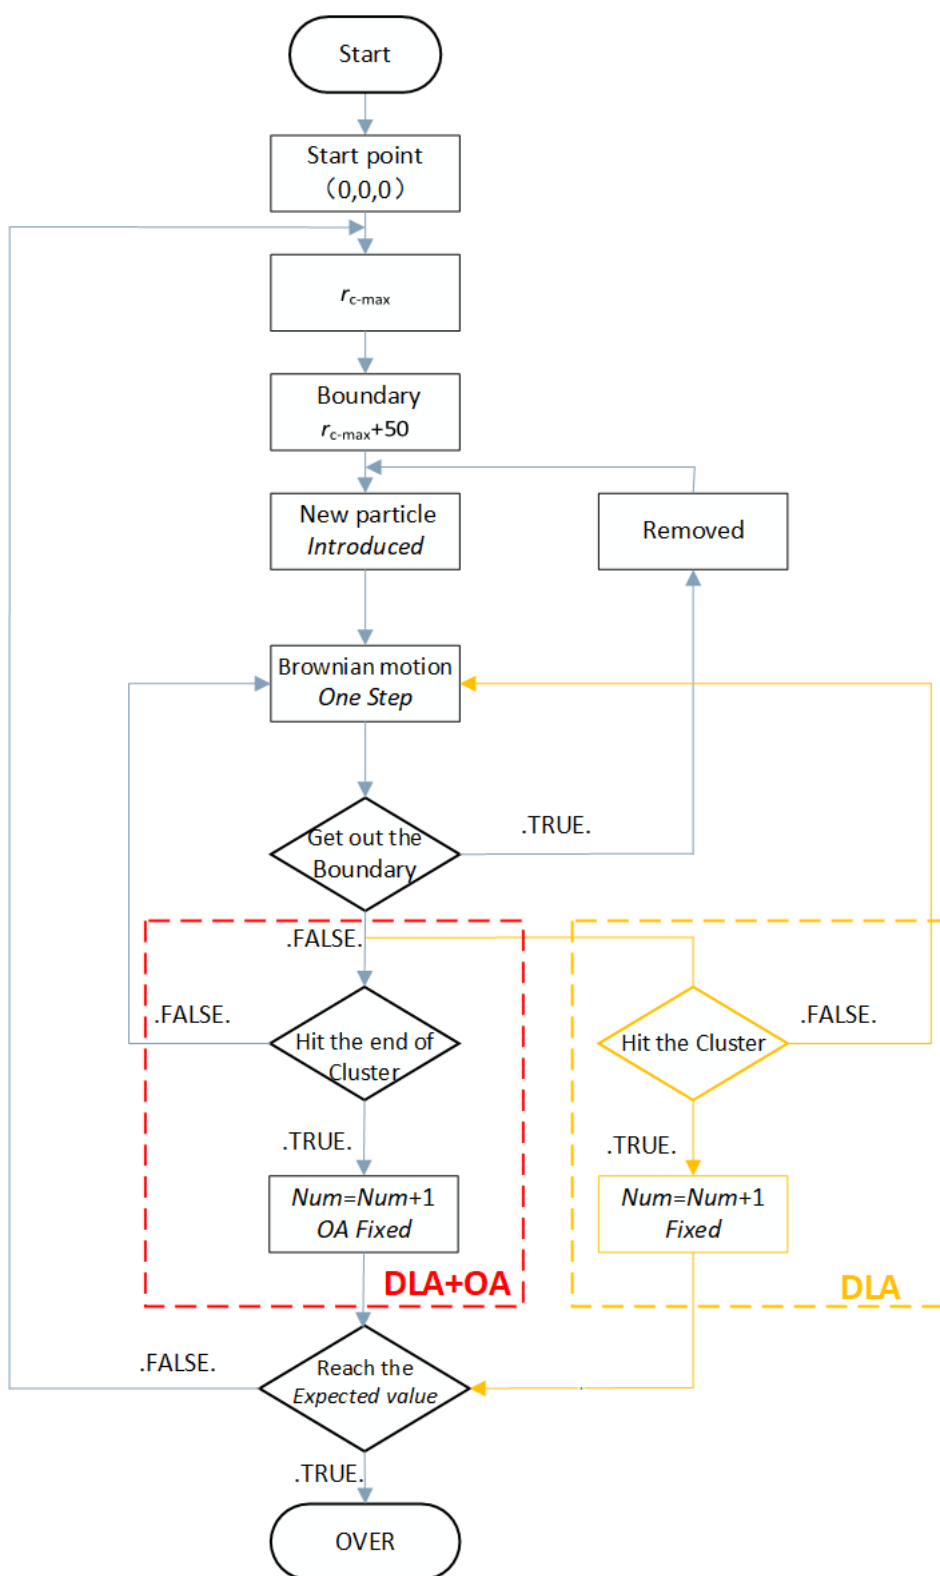

Fig. 1s The logic diagram of simulation process for DLA+OA and DLA. Where *Num* is the expected number of particles in the cluster.

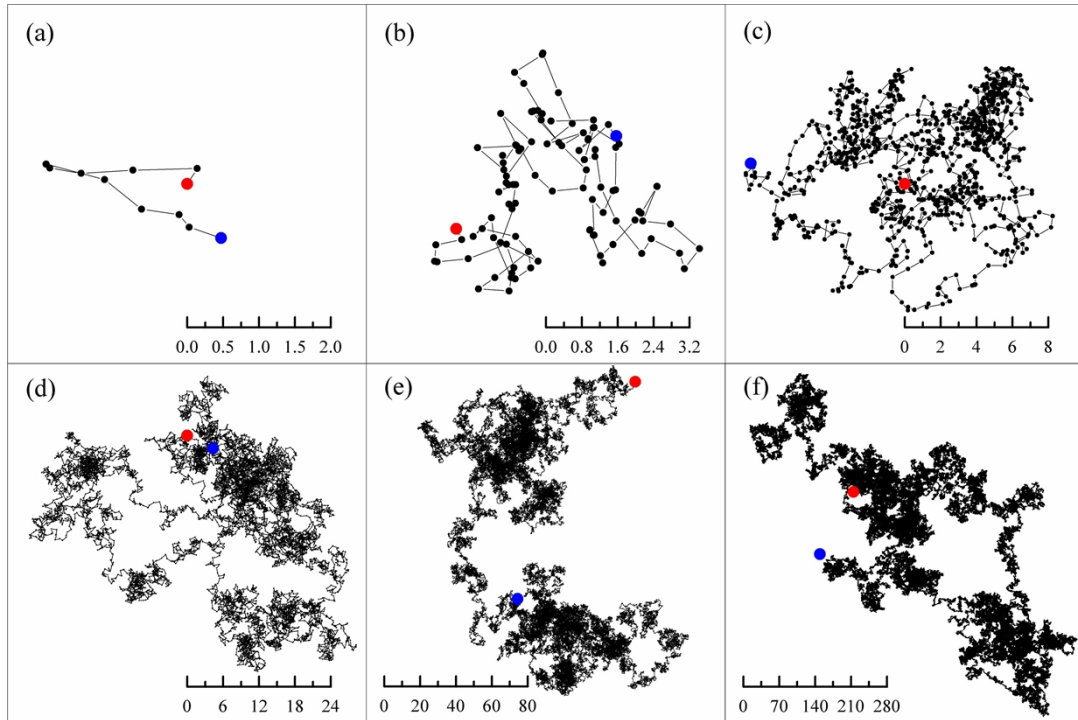

Fig. 2s Brownian motion of one particle in 2D plane with different steps.  $r_{\max}=1$ . Starting point  $(0, 0, 0)$ . (a)10; (b)100; (c)1 000; (d)10 000; (e)100 000; (f)1 000 000. Red: Start; Blue: End.

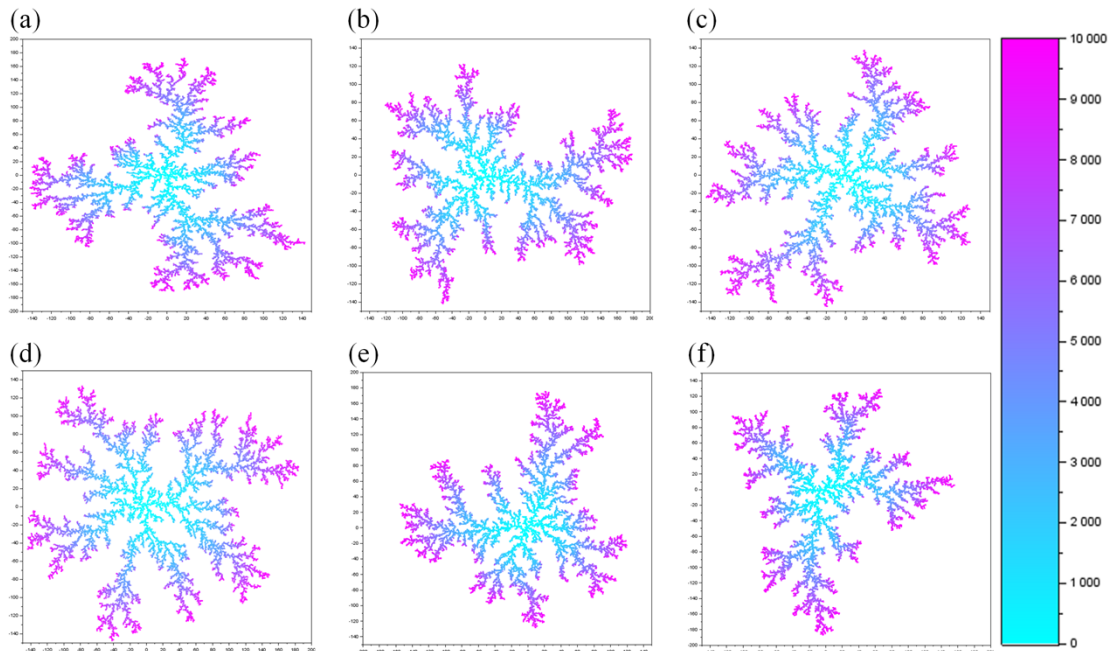

Fig. 3s Random aggregate of DLA with 10000 particles on a 2D plane with a basic point  $(0, 0)$ . (a)  $r_{\max}=0.5$ ,  $\text{Dist}<1$ ,  $r$  and  $\theta$  randomly,  $\phi=0$ ; (b)  $r=0.5$ ,  $\text{Dist}<1$ ,  $\theta$  randomly,  $\phi=0$ ; (c)  $r=0.5$ ,  $\text{Dist}<1$ ,  $\theta=0, 0.5\pi, \pi$  or  $1.5\pi$ ,  $\phi=0$ ; (d)  $r_{\max}=0.25$ ,  $\text{Dist}<1$ ,  $r$  and  $\theta$  randomly,  $\phi=0$ ; (e)  $r_{\max}=0.75$ ,  $\text{Dist}<1$ ,  $r$  and  $\theta$  randomly,  $\phi=0$ ; (f)  $r_{\max}=0.99$ ,  $\text{Dist}<1$ ,  $r$  and  $\theta$  randomly,  $\phi=0$ .

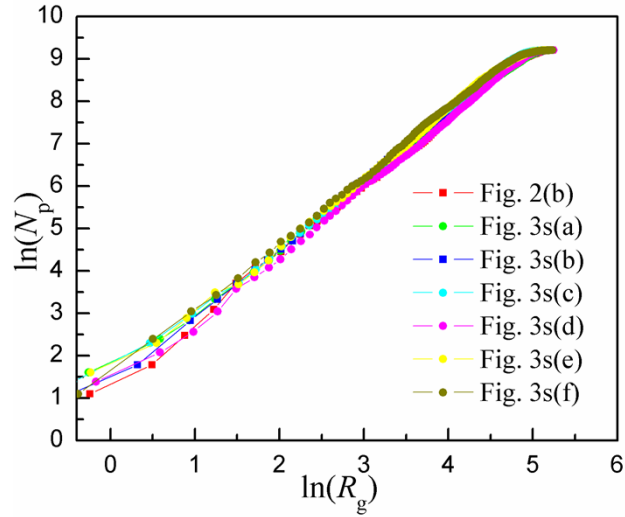

Fig. 4s The relationship of  $N_p$  and  $R_g$  for the 2D cluster as shown in Fig. 2(b) and Fig. 3s.

Table 1s The fractal dimensionality of the clusters shown in Fig. 3s.

| Entry | Radius of gyration ( $R_g$ ) |       | Fractal dimensionality ( $D$ ) |      |      |
|-------|------------------------------|-------|--------------------------------|------|------|
|       | 50%                          | 95%   | 50%                            | 75%  | 95%  |
| (a)   | 94.5                         | 158.5 | 1.55                           | 1.54 | 1.53 |
| (b)   | 87.5                         | 153.4 | 1.59                           | 1.59 | 1.56 |
| (c)   | 84.5                         | 142.4 | 1.59                           | 1.60 | 1.58 |
| (d)   | 94.5                         | 153.5 | 1.61                           | 1.62 | 1.61 |
| (e)   | 81.5                         | 145.5 | 1.60                           | 1.60 | 1.57 |
| (f)   | 83.5                         | 149.5 | 1.59                           | 1.59 | 1.55 |

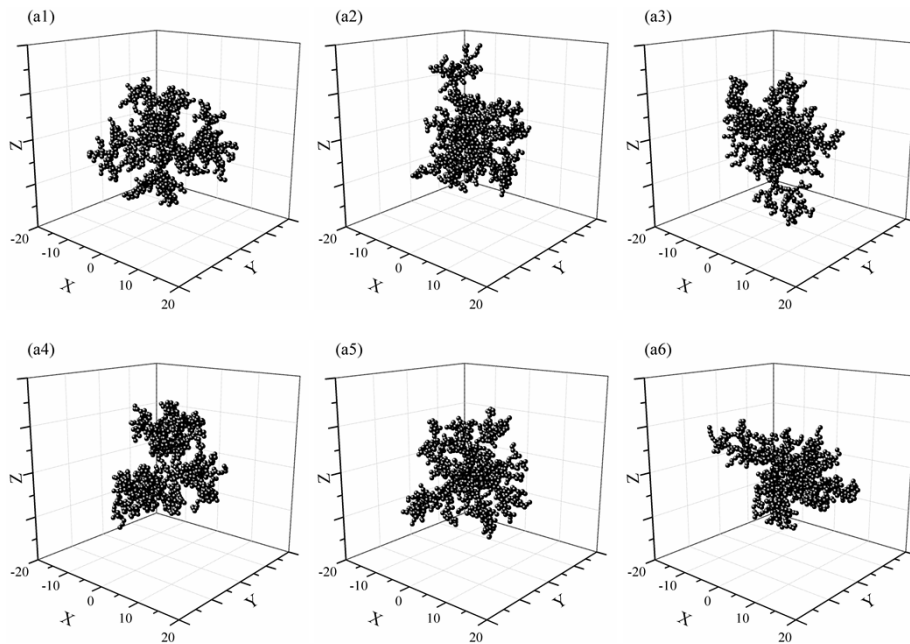

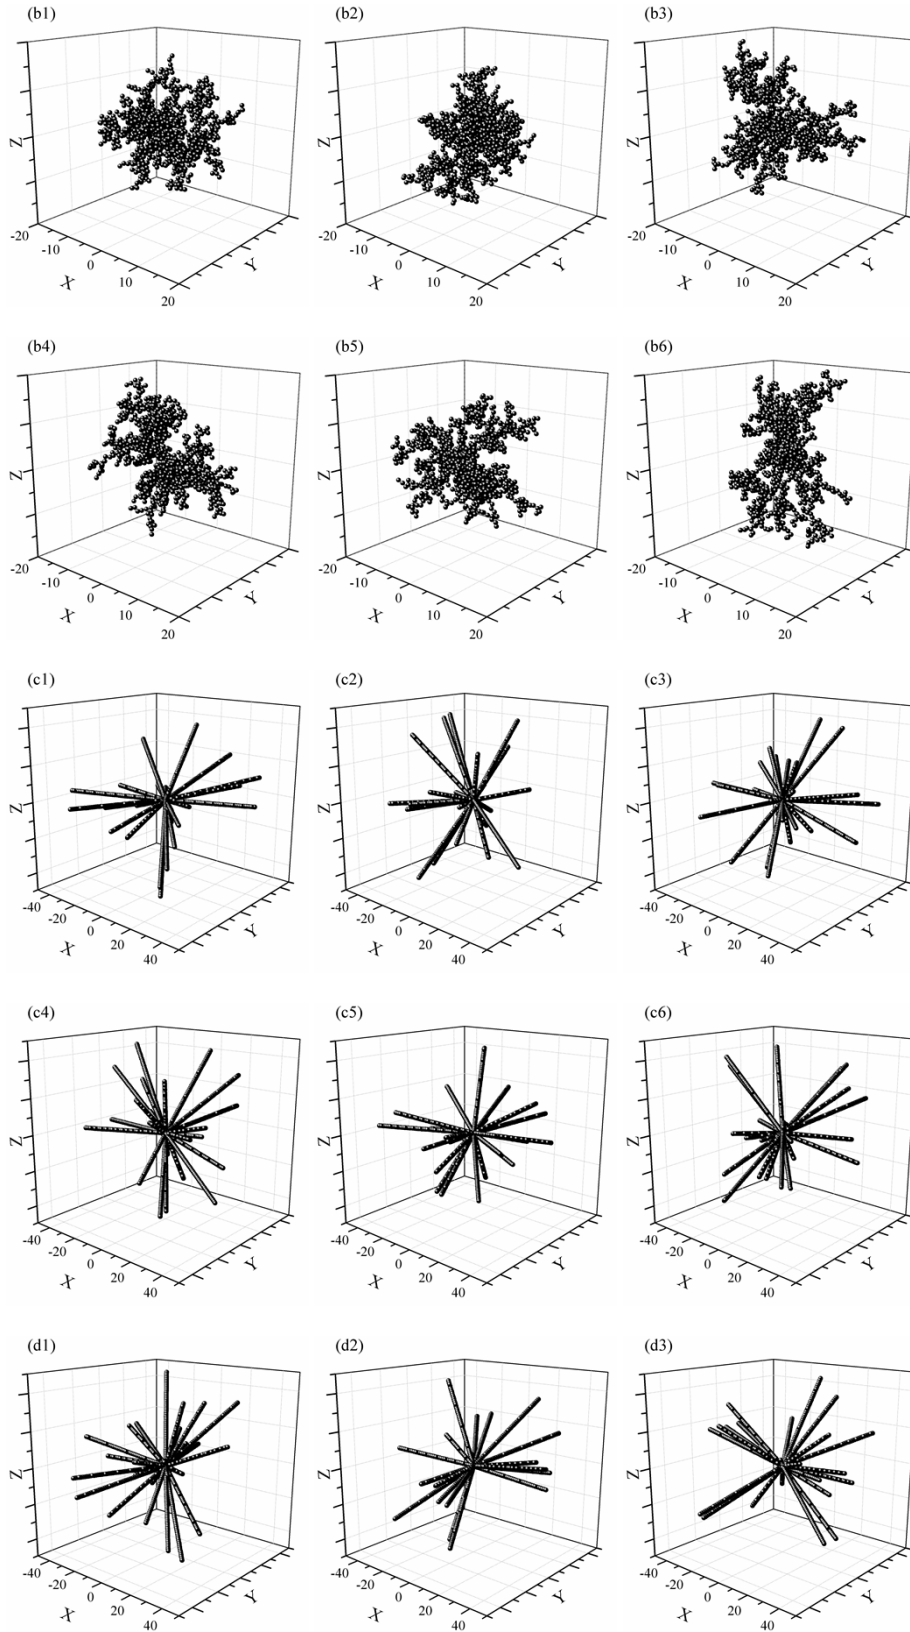

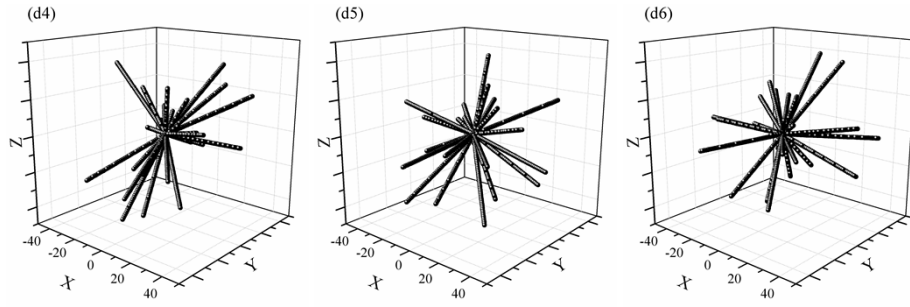

Fig. 5s The replication of random aggregate with 1000 particles as shown in Fig 2. Basic point (0, 0, 0),  $r_{\max}=0.5$ . (a1~a6)  $Dist<1$ ; (b1~b6)  $Dist=1$ ; (c1~c6)  $Dist<1$ , OA; (d1~d6)  $Dist=1$ , OA.

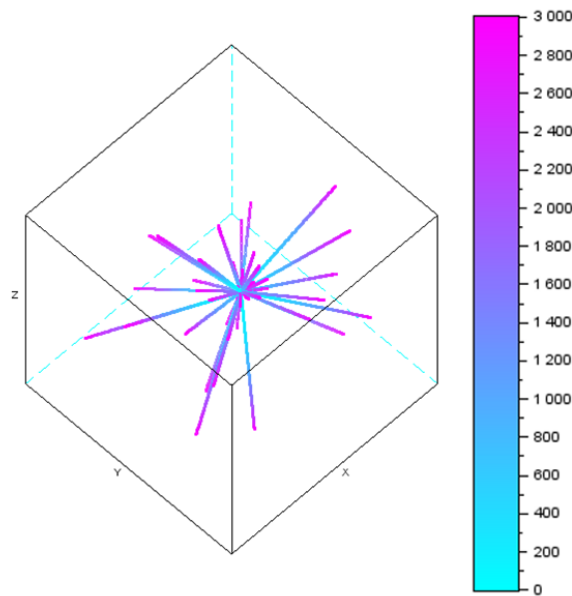

Fig. 6s The random aggregate process of DLA and OA with 3000 particles. Basic point (0, 0, 0),  $r_{\max}=0.5$ ,  $Dist=1$ .

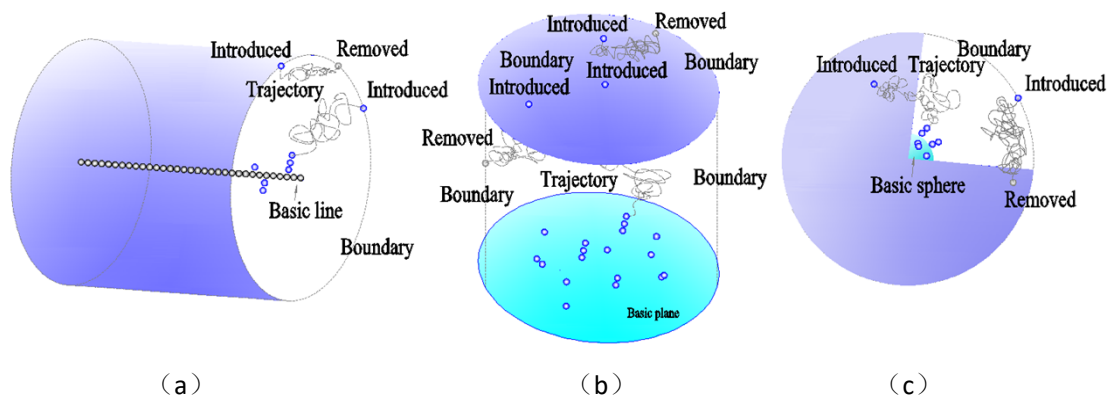

Fig. 7s The simulation models for random aggregate with DLA and OA based on line (a), plane (b) and sphere (c).
